# Supplementary material
Source: PubMed Central journal article supplement (PMC6984988)
Supplement: NIHMS1054282-supplement-Supp_info.pdf [file NIHMS1054282-supplement-Supp_info.pdf]

Supplementary Figure 1

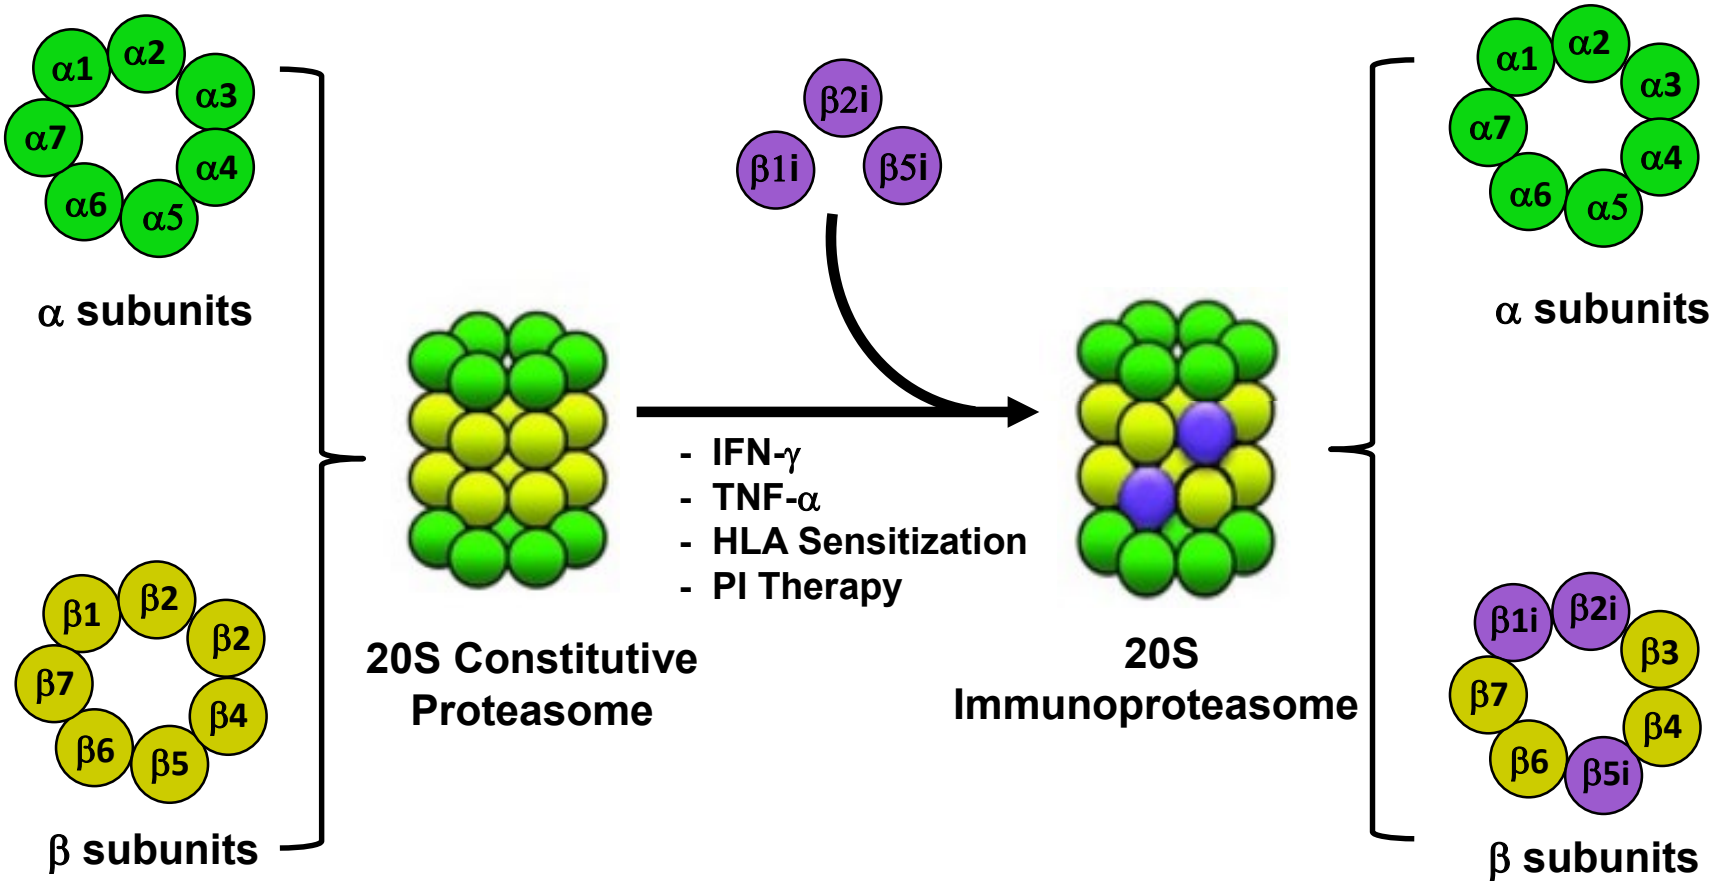

| <u>Gene</u>   | <u>Subunit</u>     | <u>Catalytic Activity</u> | <u>Substrate Selectivity</u> |
|---------------|--------------------|---------------------------|------------------------------|
| <i>PSMB5</i>  | $\beta 5$          | Chymotrypsin-like         | Small hydrophobic            |
| <i>PSMB6</i>  | $\beta 1$          | Caspase-like              | Acidic                       |
| <i>PSMB7</i>  | $\beta 2$          | Trypsin-like              | Basic, neutral               |
| <i>PSMB8</i>  | $\beta 5i$ , LMP7  | Chymotrypsin-like         | Bulky hydrophobic            |
| <i>PSMB9</i>  | $\beta 1i$ , LMP2  | Chymotrypsin-like         | Small hydrophobic            |
| <i>PSMB10</i> | $\beta 2i$ , MECL1 | Trypsin-like              | Basic, neutral               |

HLA-Sensitized Patient Bone Marrow Aspirate and Biopsy

RBC Removal  
Ficoll-Density Gradient Centrifugation

Bone Marrow Mononuclear Cell Fraction

Immunomagnetic Positive Selection of  
CD138+ Cells

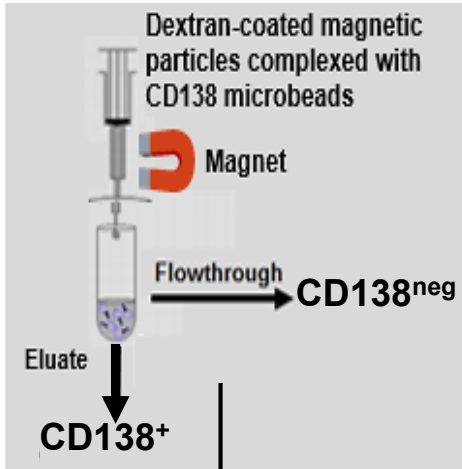

Live Cell Selection by Flow Cytometry

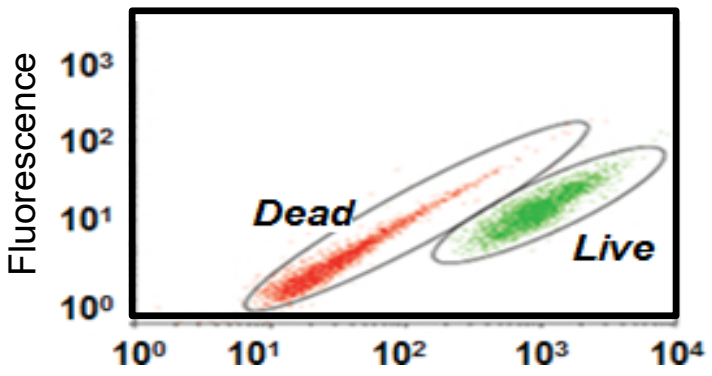



# Supplementary Figure 4

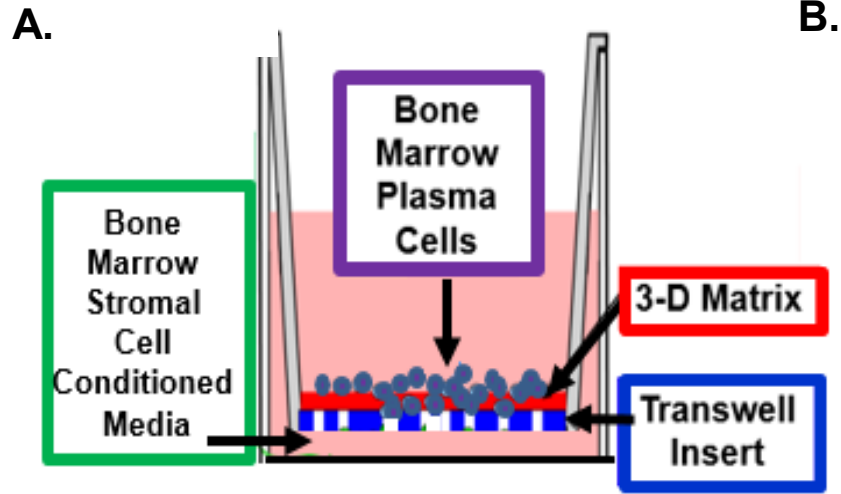

**B.**

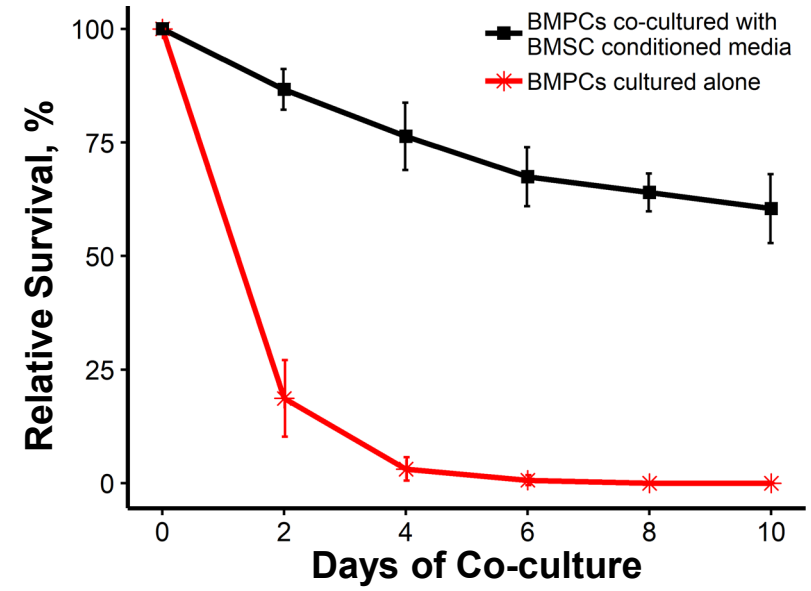

Supplementary Figure 5A

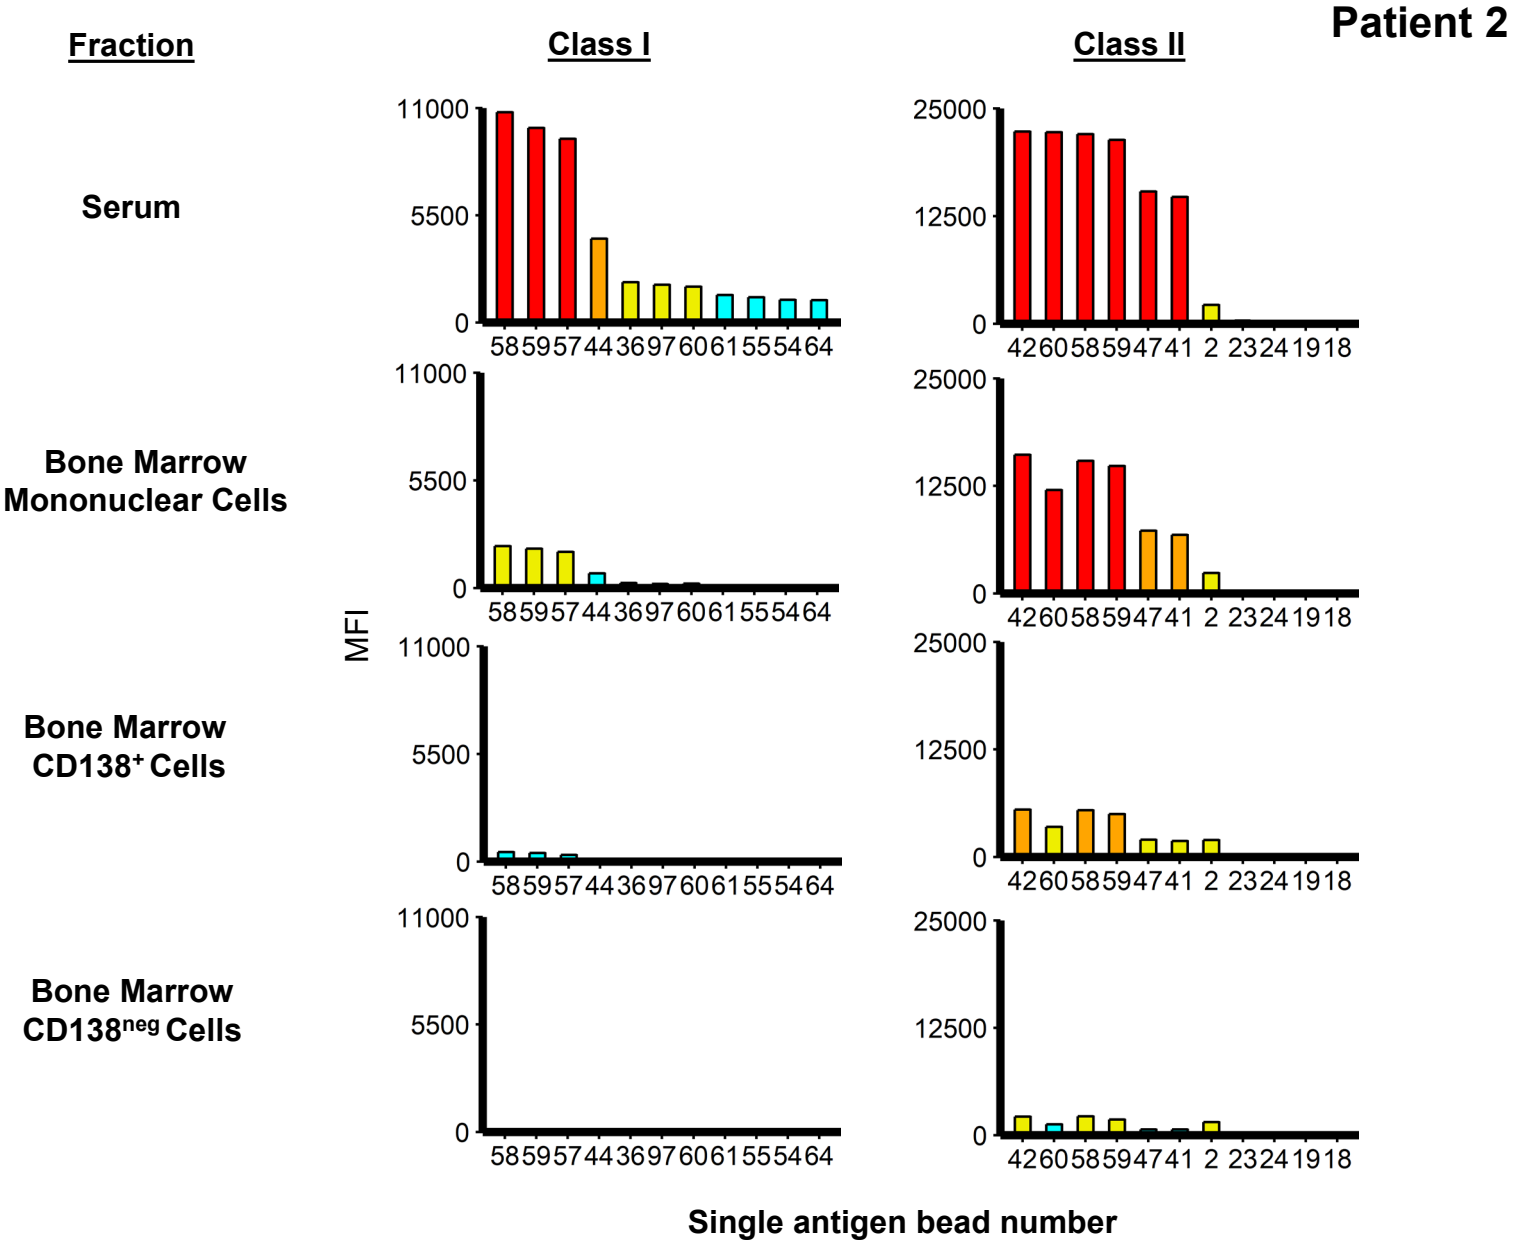

Supplementary Figure 5B

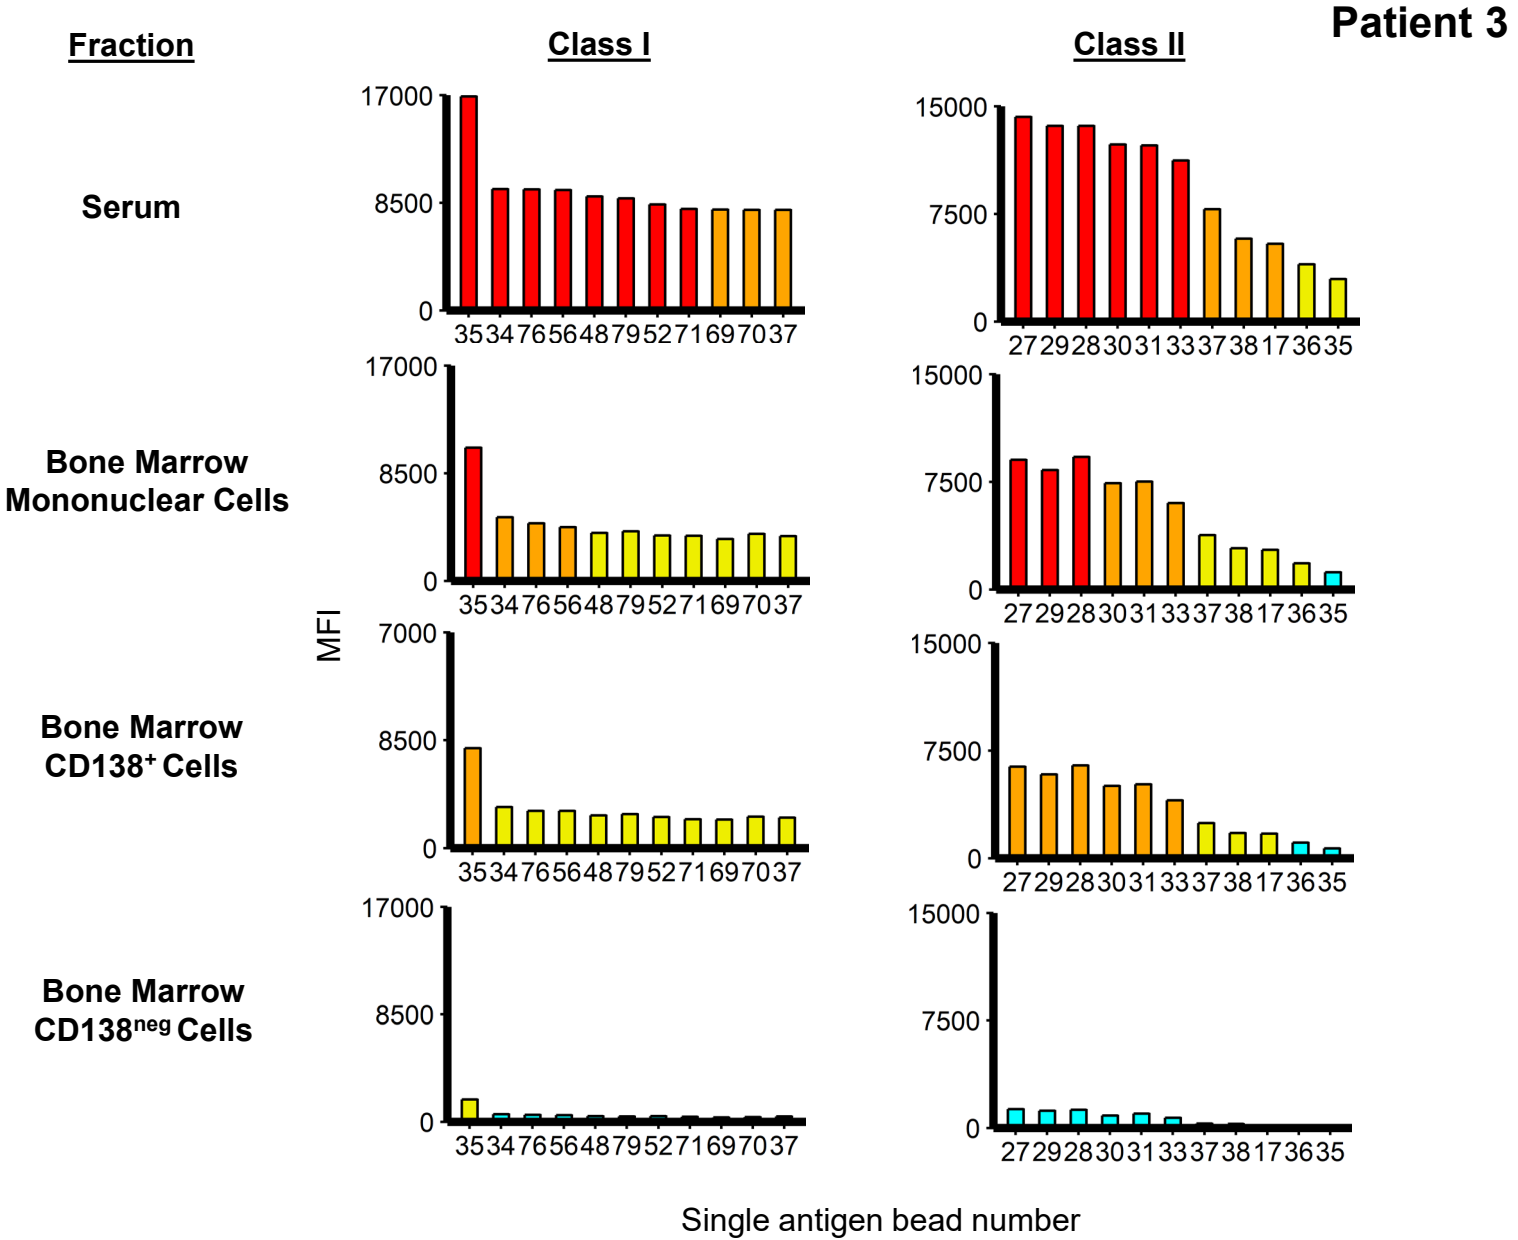

# Supplementary Figure 6A

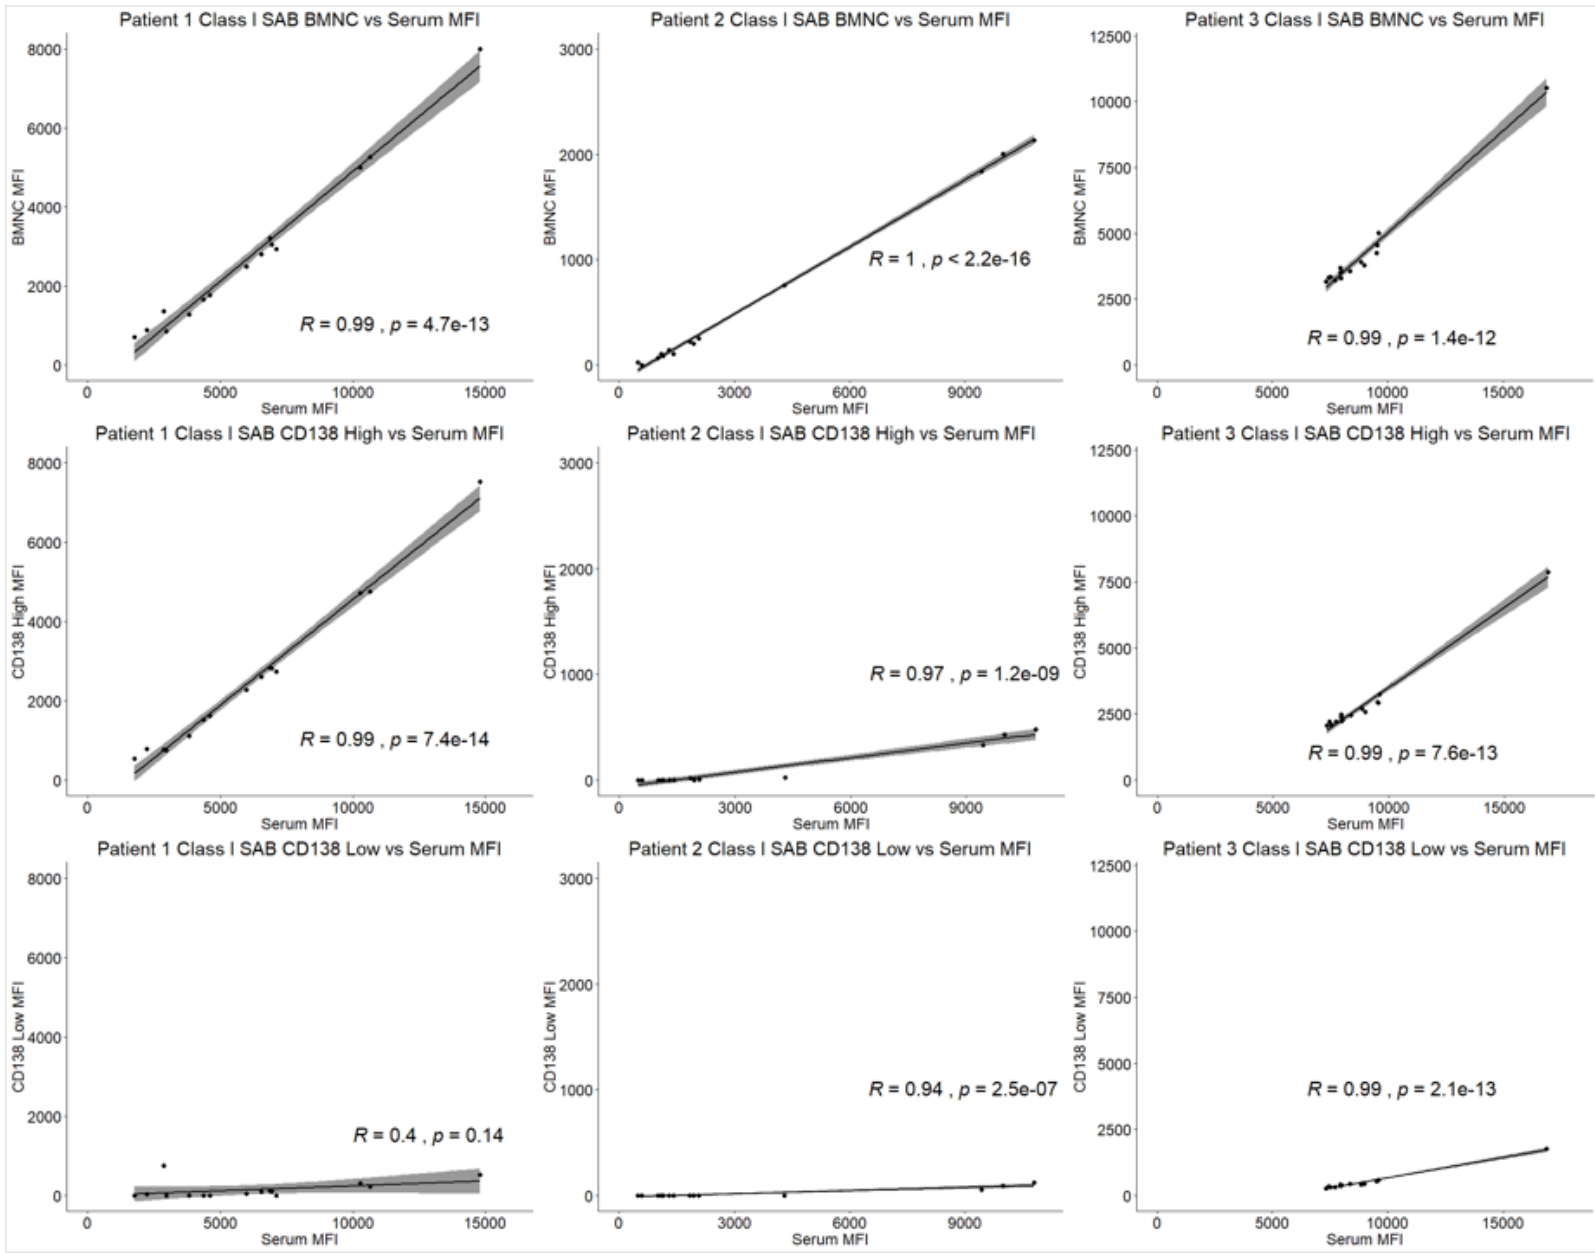

# Supplementary Figure 6B

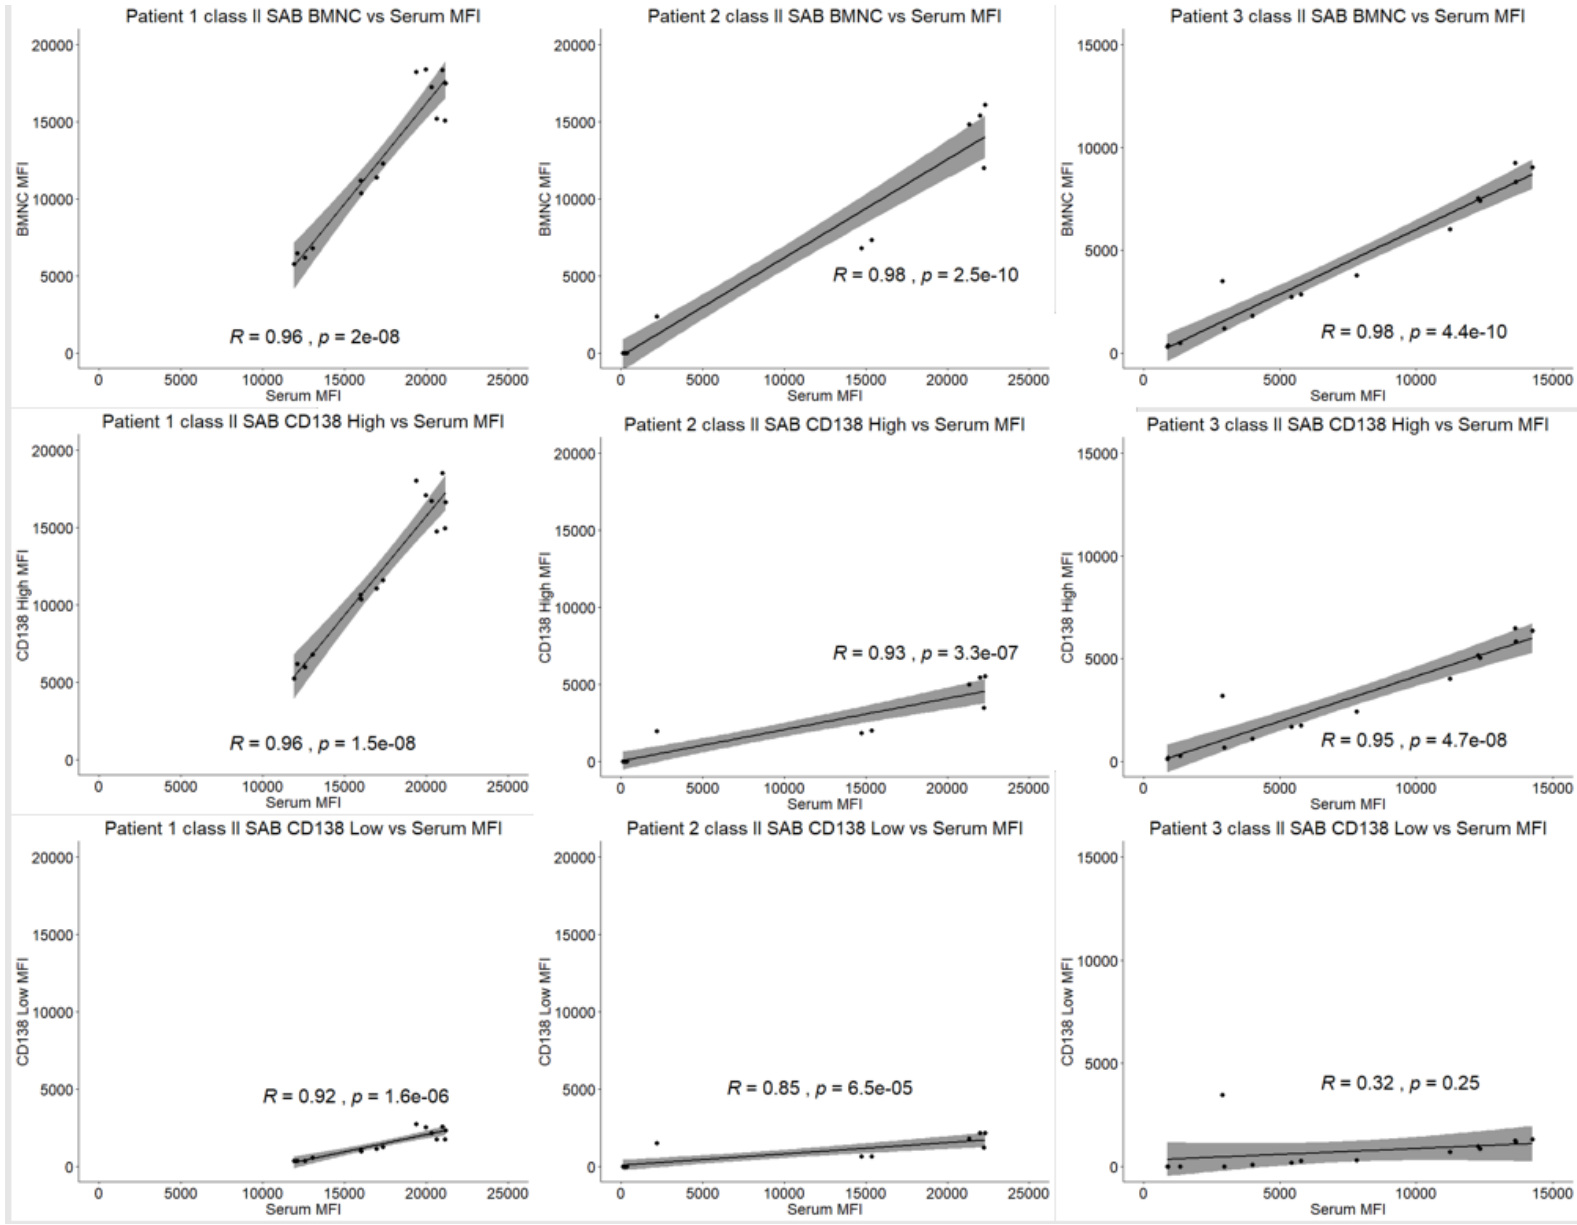



Supplementary Figure 7

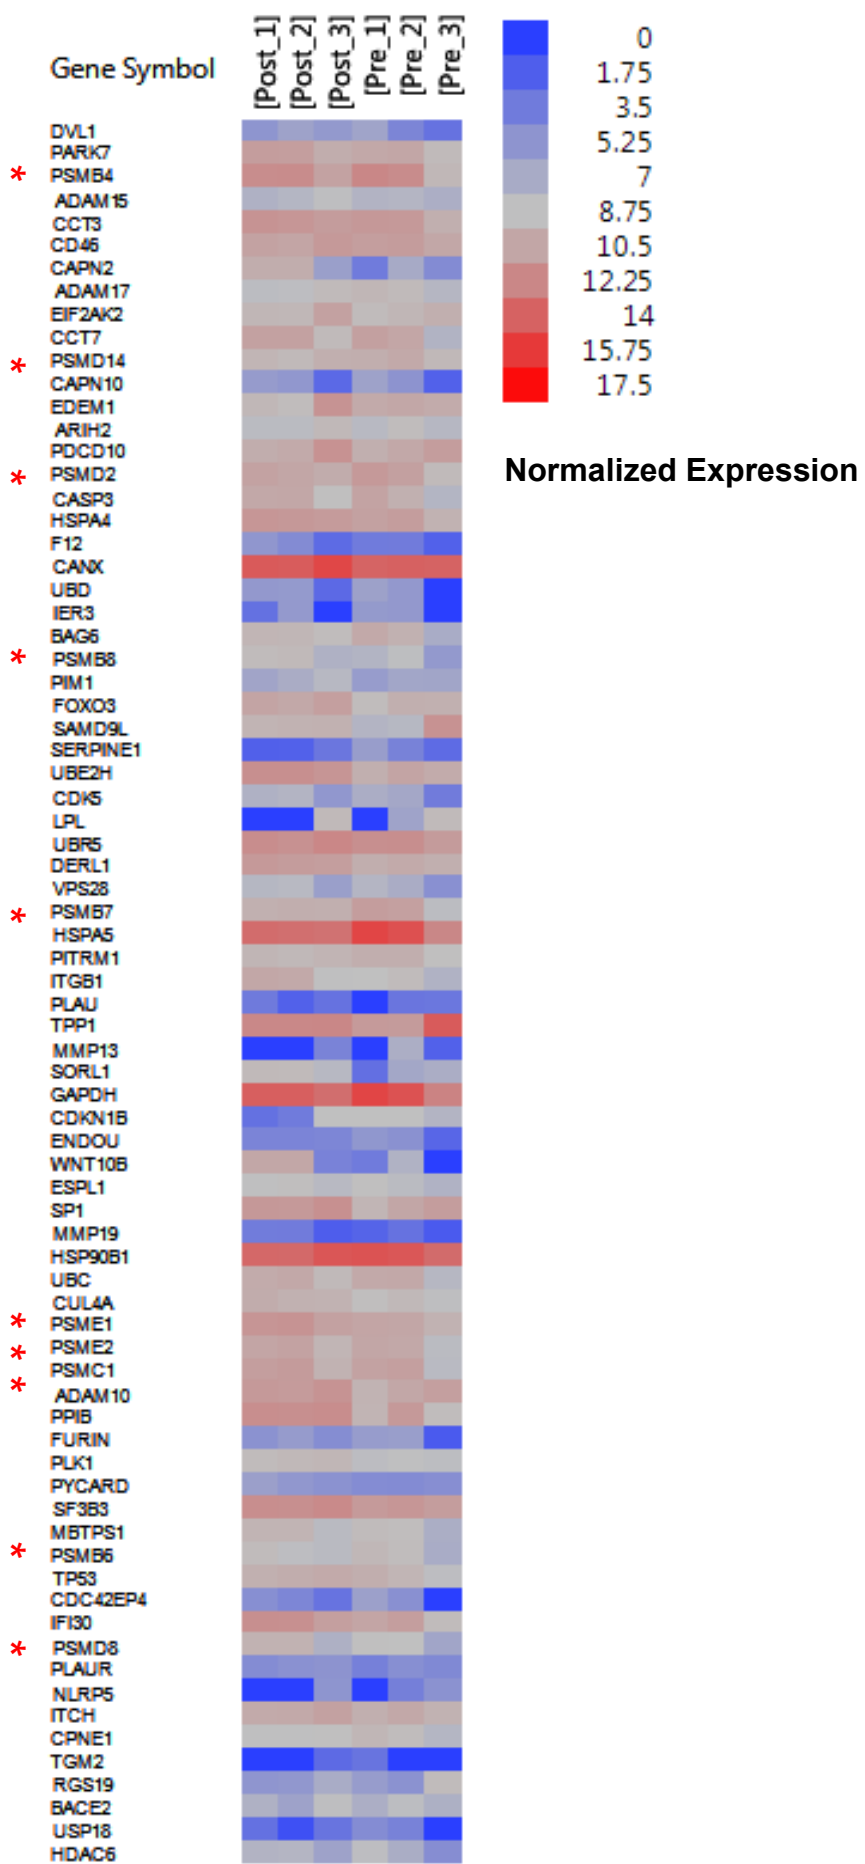

Supplementary Figure 8

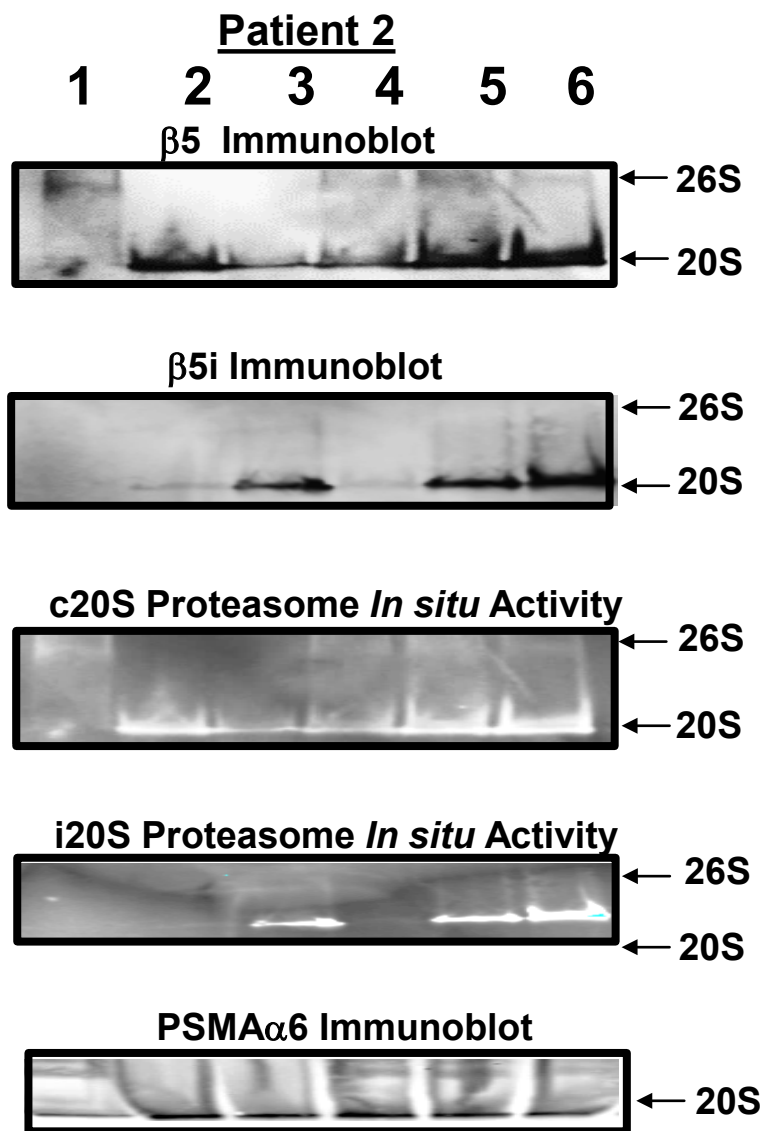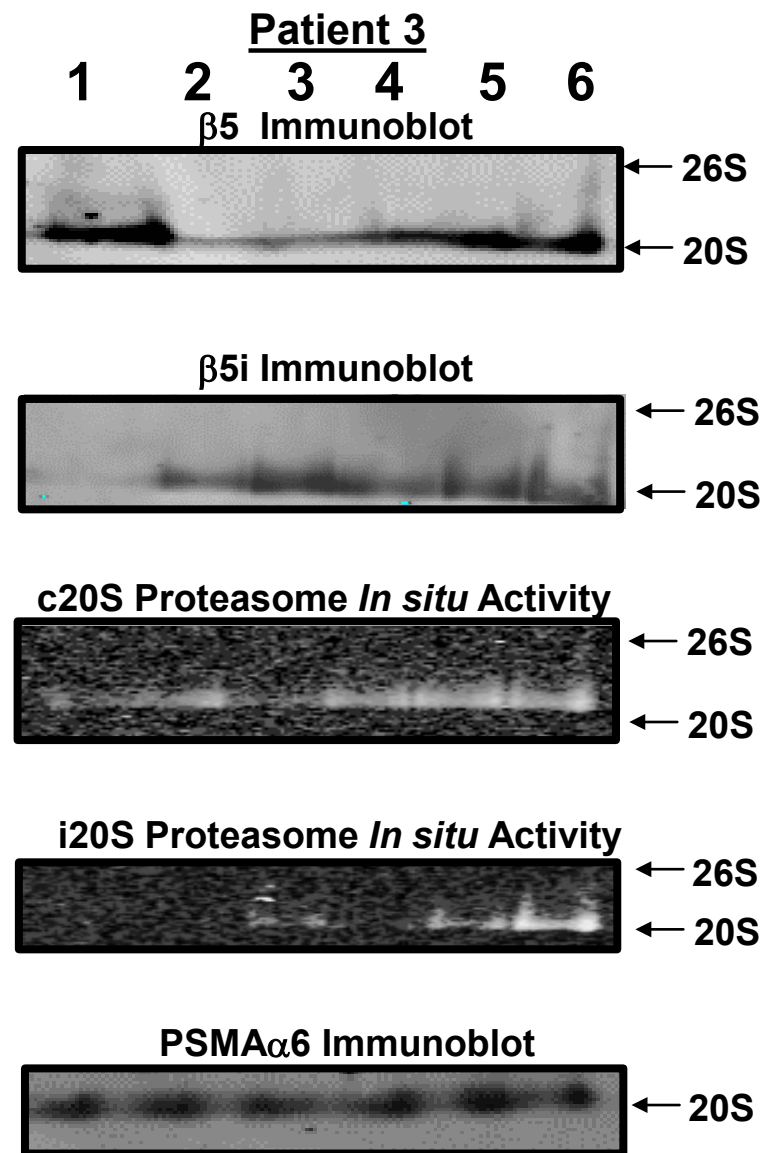

## SUPPLEMENTARY INFORMATION

**Supplementary Figure 1.** Schematic representation of IFN- $\gamma$ -induced conversion of c20S proteasomes to i20S proteasomes. IFN- $\gamma$  and other activators, e.g., IFN- $\gamma$ , TNF- $\alpha$ , trigger transcriptional increases in at least five proteasome catalytic and activator subunits which cooperate to form an i20S proteasomes. New catalytic subunits ( $\beta 1i$ ,  $\beta 2i$ ,  $\beta 5i$ ) and activator subunits (PA28 $\alpha$  and PA28 $\beta$ ) are incorporated into i20S proteasomes. **C.** Genes that encode c20S and i20S proteasomes catalytic subunits, activities and substrate specificities.

**Supplementary Figure 2.** Scheme to isolate CD138<sup>+</sup> cells from BM of HLA-sensitized patients.

**Supplementary Figure 3.** Carfilzomib treatment schedule for HLA-sensitized renal transplant candidates. Transplant candidates were enrolled in IRB-approved clinical trial NCT02442648 to determine the effect of *in vivo* carfilzomib therapy on HLA and iAb levels (24).

**Supplementary Figure 4.** Semi-permeable transwell device to co-culture BMPCs (upper chamber) with BMSCs or BMSC-conditioned media (lower chamber). **B.** Effect of BMSCs, BMSC-conditioned media or individual growth factors on the relative survival of patient BMPCs in the co-culture system. Patient BMPCs (5,000 cells) were co-cultured with BMSCs, BMSC-conditioned media or individual growth factors and the relative number of cells that survived counted. Assays were performed in triplicate and viability was determined by trypan blue staining. Shown is a representative experiment using cells from a single patient. Similar results were observed using cells from three different patients.

**Supplementary Figure 5.** Class I and II Ab levels were determined in the serum from HLA-sensitized patients using the SAB assay and BMPCs from two additional patients as in Fig. 1. BM mononuclear cells (20,000 cells/assay), CD138<sup>+</sup> (100,000 cells/assay) and CD138<sup>neg</sup> PCs (100,000 cells/assay) from that same patient were incubated in 100uL BMSC media at 37°C for 72 h.

Culture supernatants were then removed and used for SAB assays. Histograms of luminex™ SAB assays to determine class I and II HLA levels in patient serum and cell fractions are shown. Supp. Fig 5A represents results for patient 2 and Supp. Fig 5B represents patient 3.

**Supplementary Figure 6. A.** Plots to correlate class I levels in patient serum with class I levels detected in supernatants from CD138<sup>+</sup> cells of that same patient BM using the SAB assay. **B.** Plots to correlate class II SAB levels in patient serum with class II SAB levels detected in supernatants from CD138<sup>+</sup> cells of that same patient BM using the SAB assay. (N=3 patients).

**Supplementary Figure 7.** Heat map for supervised analysis of UPS genes most differentially expressed in BMPCs isolated from individual transplant candidates following *in vivo* carfilzomib therapy relative to their expression in BMPCs isolated prior to treatment.

Hierarchical clustering was performed by Ward's method using Euclidean distance metrics. Red asterisks indicate proteasome and immunoproteasome-specific genes.

**Supplementary Figure 8.** Native gel electrophoresis to detect structural and functional changes within proteasomes isolated from patient BMPCs. **A.** Samples were run on 3-8% Bis-Tris protein gels (Invitrogen) for 45 V at 4°C overnight Western blot using proteasomes isolated from human erythrocytes, liver or spleen (lanes 1-3). Samples from the PCs of a healthy adult (lane 4) or from a single HLA-sensitized patient prior to and after *in vivo* carfilzomib therapy (lanes 5 and 6). Samples (5ug each) were loaded onto native gels and electrophoresed as above. **A.** Western blot using a proteasome β5-specific Ab with the same samples electrophoresed as above. **B.** Western blot using a proteasome β5i (PSMB8) subunit-specific Ab with the same samples electrophoresed as above. **C.** Activity overlay assay using the pan-proteasome fluorogenic substrate Suc-LLVY-MCA. **D.** Activity overlay assay using the i20S proteasome substrate Ac-ANW-AMC. **E.** Western blot using proteasome subunit alpha6 as loading control.

**Supp. Table 1.** Patient demographic features and clinical characteristics of patients included in the current study.

|                                                 | <u>Overall</u>       |
|-------------------------------------------------|----------------------|
| <b>N (number of patients)</b>                   | 3                    |
| <b>Age (mean (sd))</b>                          | 40.78 (17.84)        |
| <b>Time on dialysis (years, mean (sd))</b>      | 7.42 (1.33)          |
| <b>African American (%)</b>                     | 1 (33.3)             |
| <b>Female (%)</b>                               | 2 (66.7)             |
| <b>Hypertension</b>                             | 2 (66.7)             |
| <b>Diabetes</b>                                 | 1 (33.3)             |
| <b>Etiology of ESRD (%)</b>                     |                      |
| Hypertension                                    | 1 (33.3)             |
| Alports syndrome                                | 1 (33.3)             |
| Dysplastic Kidneys                              | 1 (33.3)             |
| <b>Hemodialysis (%)</b>                         | 3 (100.0)            |
| <b>Prior transplant(s) (%)</b>                  | 3 (100.0)            |
| Number of prior transplants (median [IQR])      | 1.00 [1.00, 1.00]    |
| <b>Etiology of prior transplant failure (%)</b> |                      |
| Chronic rejection                               | 1 (33.3)             |
| Polyoma (BK) nephropathy                        | 1 (33.3)             |
| Acute Rejection                                 | 1 (33.3)             |
| <b>Previous transplant nephrectomy (%)</b>      | 0 (0)                |
| <b>History of pregnancy (%)</b>                 | 0 (0)                |
| <b>History of blood transfusion</b>             | 2 (66.7)             |
| <b>UNOS cPRA (% mean (sd))</b>                  | 99.85 (0.14)         |
| <b>UNOS cPRA (% median [IQR])</b>               | 99.89 [99.80, 99.93] |

**Supp. Table 2.** The top ten genes up- or down regulated in patient BMPCs following *in vivo* carfilzomib therapy.

| <b>Gene</b> | <b><u>Fold Change ([Post/Pre])</u></b> | <b><u>Log Fold Change ([Post/Pre])</u></b> |
|-------------|----------------------------------------|--------------------------------------------|
| MUC17       | 30.72                                  | 4.94                                       |
| ZNF645      | 25.09                                  | 4.65                                       |
| VN1R1       | 24.33                                  | 4.60                                       |
| JAKMIP3     | 23.06                                  | 4.53                                       |
| SH3TC2      | 21.17                                  | 4.40                                       |
| MUC4        | 20.05                                  | 4.33                                       |
| MAPT-IT1    | 19.49                                  | 4.28                                       |
| SMCO3       | 18.79                                  | 4.23                                       |
| NMNAT2      | 18.19                                  | 4.18                                       |
| MSL3P1      | 16.61                                  | 4.05                                       |

| <b>Gene</b> | <b><u>Fold Change ([Post/Pre])</u></b> | <b><u>Log Fold Change ([Post/Pre])</u></b> |
|-------------|----------------------------------------|--------------------------------------------|
| SATL1       | -68.67                                 | -6.10                                      |
| PYGM        | -24.04                                 | -4.59                                      |
| RPRM        | -14.64                                 | -3.87                                      |
| ARHGEF25    | -13.56                                 | -3.76                                      |
| SYNC        | -12.58                                 | -3.65                                      |
| ABO         | -11.63                                 | -3.54                                      |
| NPIPA2      | -11.59                                 | -3.54                                      |
| C2orf71     | -10.15                                 | -3.34                                      |
| SH3RF1      | -9.49                                  | -3.25                                      |
| C3orf65     | -9.37                                  | -3.23                                      |

A p-value cutoff of 0.05 was considered statistically significant (Fisher's exact test).

**Supp. Table 3.** The top ten genes with the UPS up- or down regulated in patient BMPCs following *in vivo* carfilzomib therapy.

| <b>Gene</b> | <b>Fold Change ([Post/Pre])</b> | <b>Log Fold Change ([Post/Pre])</b> |
|-------------|---------------------------------|-------------------------------------|
| HSPA2       | 13.8                            | 3.79                                |
| HSP18       | 6.16                            | 2.62                                |
| HSPB7       | 4.59                            | 2.20                                |
| ISG15       | 4.42                            | 2.14                                |
| RNF138P1    | 4.31                            | 2.11                                |
| UBALD2      | 3.56                            | 1.83                                |
| N4BP3       | 3.31                            | 1.73                                |
| DCAF15      | 2.46                            | 1.30                                |
| PSMB8       | 1.96                            | 0.97                                |
| PSMB7       | 1.95                            | 0.96                                |

| <b>Gene</b> | <b>Fold Change ([Post/Pre])</b> | <b>Log Fold Change ([Post/Pre])</b> |
|-------------|---------------------------------|-------------------------------------|
| CCNB3       | -6.34                           | -2.66                               |
| YAP1        | -5.48                           | -2.46                               |
| RNF148      | -4.25                           | -2.09                               |
| CCNJL       | -4.01                           | -2.00                               |
| RNF113B     | -3.90                           | -1.96                               |
| ZNF137P     | -2.57                           | -1.36                               |
| CDKN2B      | -2.32                           | -1.21                               |
| PSMD6-AS2   | -2.23                           | -1.16                               |
| DNAJB7      | -2.11                           | -1.08                               |
| UBLCP1      | -1.80                           | -0.85                               |

A p-value cutoff of 0.05 was considered statistically significant (Fisher's exact test).

**Supp. Table 4.** GSEA for proteasome and immunoproteasome-associated genes.

| <b><u>Gene</u></b> | <b><u>Fold Change ([Post/Pre])</u></b> | <b><u>Log Fold Change ([Post/Pre])</u></b> |
|--------------------|----------------------------------------|--------------------------------------------|
| <i>PSMB8</i>       | 1.96                                   | 0.97                                       |
| <i>PSMB7</i>       | 1.95                                   | 0.96                                       |
| <i>PSMC1</i>       | 1.74                                   | 0.80                                       |
| <i>PSMB6</i>       | 1.74                                   | 0.80                                       |
| <i>PSME2</i>       | 1.67                                   | 0.80                                       |
| <i>PSME1</i>       | 1.63                                   | 0.71                                       |
| <i>PSMD2</i>       | 1.56                                   | 0.64                                       |
| <i>PSMB4</i>       | 1.52                                   | 0.61                                       |
| <i>PSMD8</i>       | 1.50                                   | 0.59                                       |
| <i>PSMD13</i>      | 1.50                                   | 0.59                                       |

A p-value cutoff of 0.05 was considered statistically significant (Fisher's exact test).



**Supp. Table 5.** Cytokines, chemokines and cell surface receptors deregulated in BMPCs following *in vivo* carfilzomib therapy.

|                                                      | <b><u>Fold Change in Expression ([Post]/[Pre])</u></b> |
|------------------------------------------------------|--------------------------------------------------------|
| G-protein receptor                                   | 8.24                                                   |
| IFN-induced protein with tetratricopeptide repeats 3 | 3.66                                                   |
| Chemokine (C-X-C motif)                              | 3.09                                                   |
| Guanylate binding protein 1, IFN-inducible           | 3.06                                                   |
| Growth factor receptor-bound protein 7               | 2.29                                                   |
| IFN, gamma-inducible protein 30                      | 1.73                                                   |
| IFN-induced protein with tetratricopeptide repeats 5 | 1.72                                                   |
| Leptin receptor                                      | 1.52                                                   |

A p-value cutoff of 0.05 was considered statistically significant (Fisher's exact test).
